# Supplementary material
Source: ML conference proceedings conference paper supplement (https://aclanthology.org/2021.deelio-1.12)
Supplement: OptionalSupplementaryData [file 2021.deelio-1.12.OptionalSupplementaryData.pdf]

## A Datasets

In our work we have used multiple datasets and modified them according to different experimental setups. This section details each dataset.

### A.1 Ads. Dataset

Ads. Dataset (Hussain et al., 2017) contains 64,832 images annotated with sentiments, topics, slogans, and action reason pairs (ARP). ARPs are question-and-answer type sentences. Eg: *I should buy a Butterfinger because it will make my life more fun.* Here, *Butterfinger* is the brand and *fun* is the attribute. Since, most of our experiments are cloze style, ARP annotations became a rich source for sentences containing brands and attributes together. The Ads. Dataset contains 2,02,090 ARPs out of which only 35,340 ARPs have explicit mentioning of 418 Lovett’s brands. Eg: I should buy **Apple** watch. There are 898 ARPs with multiple brand instances. We remove such ARPs to reduce noise and irregularities.

### A.2 Lovett’s Dataset

This dataset was formally introduced by (Lovett et al., 2014) in 2014. The dataset contains 697 top U.S. national brands with 136 different measures of the brand characteristics across 16 brand categories covered by 2010. The measures reported in the dataset includes personality, satisfaction, age, attributes related to Rogers’ innovation scheme such as complexity, and the four brand equity pillars of Young and Rubicam’s BrandAsset Valuator. The data was collected from different sources. Moreover, it includes an original survey on 4,769 subjects. For our experiments, we consider 40 brand image attributes from Young and Rubicam’s BrandAsset Valuator (BAV). For each item, the dataset contains the percentage of respondents who checked an attribute concerning the brand. While analyzing the data, we observed the presence of NaN values at certain attribute entries for few brands. We dropped these rows. Similarly, we removed movies, games, and TV-Shows from our list of brands. This resulted in 561 brands in total.

### A.3 Brand Consistency Data

Brand consistency dataset (Roy et al., 2019) contains textual data scrapped from the official websites of the Fortune 1000 companies of 2017. The considered pages (*about the company, media releases, blogs and communication.*) consist of in-

formation directed towards the customers. Data includes content from both the static as well as the dynamic webpages. In our experiments, we consider the data collected from the static pages and we only retain 1,962 sentences containing both the brand name and the affect attributes.

### A.4 Synthetic Data

IAT experiments require sentences that are similar for all the brands. Since non of our prior mentioned datasets maintains sentences that are consistent across all the brands, we are constrained to synthesize sentences that meet this specific requirement. This is widely practiced in probing literature. Table 16 details templates for Aaker’s brand personality that is used across all the brands.

## B Archetypes

The 12 archetypes and the corresponding personality traits exhibited by them.

- **Innocent:** Exhibits happiness, goodness, optimism, safety, romance, and youth.
- **Everyman:** Seeks connections and belonging; is recognized as supportive, faithful and down-to-earth.
- **Hero:** On a mission to make the world a better place, the Hero is courageous, bold, inspirational.
- **Rebel:** Questions authority and breaks the rules; the Rebel craves rebellion and revolution.
- **Explorer:** Finds inspiration in travel, risk, discovery, and the thrill of new experiences.
- **Creator:** Imaginative, inventive and driven to build things of enduring meaning and value.
- **Ruler:** Creates order from the chaos, the Ruler is typically controlling and stern, yet responsible and organized.
- **Magician:** Wishes to create something special and make dreams a reality, the Magician is seen as visionary and spiritual.
- **Lover:** Creates intimate moments, inspires love, passion, romance and commitment.
- **Caregiver:** Protects and cares for others, is compassionate, nurturing and generous.
- **Jester:** Brings joy to the world through humor, fun, irreverence and often likes to make some mischief.
- **Sage:** Committed to helping the world gain deeper insight and wisdom, the Sage serves as the thoughtful mentor or advisor.

| Attribute | Aaker's dimension | Attribute   | Aaker's dimension | Attribute   | Aaker's dimension | Attribute       | Aaker's dimension |
|-----------|-------------------|-------------|-------------------|-------------|-------------------|-----------------|-------------------|
| Arrogant  | Ruggedness        | Fun         | Excitement        | Obliging    | Sincerity         | Straightforward | Sophistication    |
| Authentic | Competence        | Popular     | Competence        | Original    | Competence        | Stylish         | Excitement        |
| Best      | Sincerity         | Glamorous   | Excitement        | Prestigious | Excitement        | Traditional     | Sincerity         |
| Carefree  | Excitement        | Reasonable  | Sophistication    | Progressive | Ruggedness        | Trendy          | Excitement        |
| Caring    | Sophistication    | Healthy     | Sincerity         | Restrained  | Ruggedness        | Trustworthy     | Sincerity         |
| Charming  | Excitement        | Helpful     | Sincerity         | Rugged      | Ruggedness        | Unapproachable  | Ruggedness        |
| Daring    | Ruggedness        | Efficient   | Competence        | Sensuous    | Excitement        | Latest          | Excitement        |
| Practical | Competence        | Independent | Ruggedness        | Simple      | Sophistication    | Elite           | Sophistication    |
| Energetic | Excitement        | Intelligent | Sincerity         | Social      | Competence        | Visionary       | Competence        |
| Friendly  | Sophistication    | Kind        | Sophistication    | Responsible | Sincerity         | Worthy          | Competence        |

Table 8: Mapping between 40 attributes from Lovett's data and five Aaker's brand dimensions.

| Brand Category                                 | Preferred Dimensions |                |
|------------------------------------------------|----------------------|----------------|
| Travel services                                | Sincerity            | Sophistication |
| Beverages                                      | Excitement           | Sincerity      |
| Children's products                            | Sincerity            | Excitement     |
| Clothing products                              | Excitement           | Sophistication |
| Telecommunications                             | Competence           | Excitement     |
| Department stores                              | Excitement           | Competence     |
| Beauty products                                | Sincerity            | Sophistication |
| Department Stores                              | Excitement           | Sincerity      |
| Health products and services                   | Sincerity            | Competence     |
| Financial services                             | Competence           | Sophistication |
| Media and entertainment                        | Excitement           | Competence     |
| Cars                                           | Sophistication       | Ruggedness     |
| Household Products (cleaning ingredients etc.) | Ruggedness           | Sincerity      |
| Sports and hobbies                             | Excitement           | Ruggedness     |
| Technology products and stores                 | Competence           | Excitement     |
| Home design and decoration                     | Sincerity            | Excitement     |

Table 9: Mapping Aaker's dimensions to brand categories using Lovett's data.

| Archetype   | Aaker's dimensions                     |
|-------------|----------------------------------------|
| Ruler       | Competence, Ruggedness, Sophistication |
| Creator     | Excitement, Sophistication             |
| Caregiver   | Sincerity                              |
| Jester      | Sincerity, Sophistication, Excitement  |
| Lover       | Sincerity, Sophistication              |
| Regular Guy | Sincerity, Competence                  |
| Outlaw      | Excitement, Ruggedness, Sophistication |
| Magician    | Sincerity, Competence, Excitement      |
| Hero        | Excitement, Sincerity, Ruggedness      |
| Sage        | Excitement, Competence                 |
| Explorer    | Excitement, Ruggedness                 |
| Innocent    | Sincerity, Excitement, Competence      |

Table 10: Mapping between the 12 brand archetypes and five Aaker's brand dimensions.

| LM         | Top archetype(s) based on the attribute overlap                   |
|------------|-------------------------------------------------------------------|
| BERT       | Ruler, Everyman, Magician, Sage, Innocent                         |
| RoBERTa    | Ruler, Everyman, Magician, Sage, Innocent                         |
| DistilBERT | Ruler, Everyman, Magician, Sage, Innocent                         |
| ALBERT     | Creator, Jester, Outlaw, Magician, Hero, Sage, Explorer, Innocent |
| BART       | Ruler, Everyman, Magician, Sage, Innocent                         |

Table 11: Archetype information extracted from the LMs for the brand *Apple*. The actual archetype of *Apple* is Ruler.

| LM         | Top archetype(s) based on the attribute overlap                   |
|------------|-------------------------------------------------------------------|
| BERT       | Creator, Outlaw, Magician, Hero, Sage, Explorer, Innocent         |
| RoBERTa    | Caregiver, Jester, Lover, Everyman, Magician, Hero, Innocent      |
| DistilBERT | Creator, Jester, Outlaw, Magician, Hero, Sage, Explorer, Innocent |
| ALBERT     | Creator, Jester, Outlaw, Magician, Hero, Sage, Explorer, Innocent |
| BART       | Caregiver, Jester, Lover, Everyman, Magician, Hero, Innocent      |

Table 12: Archetype information extracted from the LMs for the brand *GAP*. The actual archetype of *GAP* is Everyman.

| LM         | Top archetype(s) based on the attribute overlap                   |
|------------|-------------------------------------------------------------------|
| BERT       | Creator, Jester, Outlaw, Magician, Hero, Sage, Explorer, Innocent |
| RoBERTa    | Ruler, Outlaw, Hero, Explorer                                     |
| DistilBERT | Creator, Jester, Outlaw, Magician, Hero, Sage, Explorer, Innocent |
| ALBERT     | Ruler, Everyman, Magician, Sage, Innocent                         |
| BART       | Ruler, Everyman, Magician, Sage, Innocent                         |

Table 13: Archetype information extracted from the LMs for the brand *Pepsi*. The actual archetype of *Pepsi* is Jester.

| LM         | Top archetype(s) based on the attribute overlap                   |
|------------|-------------------------------------------------------------------|
| BERT       | Creator, Jester, Outlaw, Magician, Hero, Sage, Explorer, Innocent |
| RoBERTa    | Creator, Jester, Outlaw, Magician, Hero, Sage, Explorer, Innocent |
| DistilBERT | Ruler, Creator, Jester, Lover, Outlaw                             |
| ALBERT     | Creator, Jester, Outlaw, Magician, Hero, Sage, Explorer, Innocent |
| BART       | Ruler, Everyman, Magician, Sage, Innocent                         |

Table 14: Archetype information extracted from the LMs for the brand *Porsche*. The actual archetype of *Porsche* is Ruler.

|                                                       | Top-1      |            |            | Top-2      |         |         | Top-3      |            |            | Top-4      |            |            |
|-------------------------------------------------------|------------|------------|------------|------------|---------|---------|------------|------------|------------|------------|------------|------------|
|                                                       | WEAT       | LOGPROB    | WEAT       | LOGPROB    | WEAT    | LOGPROB | WEAT       | LOGPROB    | WEAT       | LOGPROB    | WEAT       | LOGPROB    |
| <b>Beauty products</b>                                | BERT       | DistilBERT | ALBERT     | BERT       | RoBERTa | RoBERTa | RoBERTa    | RoBERTa    | DistilBERT | RoBERTa    | DistilBERT | RoBERTa    |
| <b>Beverages</b>                                      | DistilBERT | DistilBERT | BERT       | BERT       | RoBERTa | RoBERTa | RoBERTa    | RoBERTa    | ALBERT     | ALBERT     | ALBERT     | ALBERT     |
| <b>Cars</b>                                           | BERT       | BERT       | RoBERTa    | RoBERTa    | ALBERT  | ALBERT  | ALBERT     | ALBERT     | DistilBERT | ALBERT     | DistilBERT | DistilBERT |
| <b>Children’s products</b>                            | DistilBERT | ALBERT     | BERT       | BERT       | RoBERTa | RoBERTa | RoBERTa    | RoBERTa    | ALBERT     | ALBERT     | ALBERT     | DistilBERT |
| <b>Clothing products</b>                              | ALBERT     | BERT       | DistilBERT | RoBERTa    | RoBERTa | RoBERTa | RoBERTa    | ALBERT     | BERT       | BERT       | BERT       | DistilBERT |
| <b>Department Stores</b>                              | BERT       | RoBERTa    | RoBERTa    | ALBERT     | ALBERT  | ALBERT  | ALBERT     | DistilBERT | DistilBERT | DistilBERT | DistilBERT | BERT       |
| <b>Financial services</b>                             | BERT       | RoBERTa    | RoBERTa    | BERT       | BERT    | ALBERT  | ALBERT     | ALBERT     | DistilBERT | ALBERT     | DistilBERT | DistilBERT |
| <b>Health products and services</b>                   | ALBERT     | BERT       | DistilBERT | ALBERT     | BERT    | BERT    | BERT       | RoBERTa    | RoBERTa    | RoBERTa    | RoBERTa    | DistilBERT |
| <b>Home design and decoration</b>                     | BERT       | RoBERTa    | RoBERTa    | BERT       | BERT    | ALBERT  | ALBERT     | DistilBERT | DistilBERT | DistilBERT | DistilBERT | ALBERT     |
| <b>Household Products (cleaning ingredients etc.)</b> | RoBERTa    | BERT       | ALBERT     | RoBERTa    | RoBERTa | ALBERT  | ALBERT     | ALBERT     | BERT       | BERT       | BERT       | DistilBERT |
| <b>Media and entertainment</b>                        | BERT       | BERT       | ALBERT     | RoBERTa    | RoBERTa | ALBERT  | ALBERT     | ALBERT     | RoBERTa    | ALBERT     | DistilBERT | DistilBERT |
| <b>Sports and hobbies</b>                             | ALBERT     | DistilBERT | BERT       | BERT       | BERT    | BERT    | RoBERTa    | RoBERTa    | RoBERTa    | RoBERTa    | DistilBERT | ALBERT     |
| <b>Technology products and stores</b>                 | BERT       | BERT       | ALBERT     | ALBERT     | ALBERT  | ALBERT  | RoBERTa    | RoBERTa    | RoBERTa    | RoBERTa    | DistilBERT | DistilBERT |
| <b>Telecommunications</b>                             | RoBERTa    | ALBERT     | BERT       | DistilBERT | ALBERT  | ALBERT  | ALBERT     | RoBERTa    | RoBERTa    | RoBERTa    | DistilBERT | BERT       |
| <b>Travel services</b>                                | RoBERTa    | BERT       | BERT       | ALBERT     | ALBERT  | ALBERT  | DistilBERT | RoBERTa    | ALBERT     | ALBERT     | ALBERT     | DistilBERT |

Table 15: Ranking language models by evaluating brand and personality associations against consumers perceptions from Lovett’s data.

| Aaker Dimension | Brand Personality | Template                                                           |
|-----------------|-------------------|--------------------------------------------------------------------|
| Sincerity       | practical         | <BRAND>is known to be <PERSONALITY>.                               |
|                 | traditional       | <BRAND>generally has a <PERSONALITY>approach.                      |
|                 | Straightforward   | <PERSONALITY>policies are preferred by <BRAND>.                    |
|                 | honest            | Customers find <BRAND>as <PERSONALITY>.                            |
|                 | sincere           | Products and offerings by <BRAND>are generally <PERSONALITY>.      |
|                 | real              | People find <BRAND>as <PERSONALITY>.                               |
|                 | wholesome         | <BRAND>promotes <PERSONALITY>lifestyle.                            |
|                 | original          | Offerings by <BRAND>are usually <PERSONALITY>.                     |
|                 | cheerful          | <BRAND>is recognized for being <PERSONALITY>.                      |
|                 | sentimental       | Often times customers feel <PERSONALITY>about the <BRAND>.         |
| Excitement      | friendly          | <BRAND>is generally <PERSONALITY>.                                 |
|                 | daring            | <BRAND>seems to be <PERSONALITY>.                                  |
|                 | trendy            | <BRAND>has a <PERSONALITY>outlook.                                 |
|                 | exciting          | Offerings by <BRAND>are generally <PERSONALITY>.                   |
|                 | spirited          | Offerings by <BRAND>are <PERSONALITY>and youthful.                 |
|                 | cool              | Product or offerings by <BRAND>are <PERSONALITY>.                  |
|                 | young             | <BRAND>is regarded as <PERSONALITY>and energetic.                  |
|                 | imaginative       | Product or offerings by <BRAND>are generally <PERSONALITY>.        |
|                 | unique            | Offerings by <BRAND>are <PERSONALITY>in the market.                |
|                 | latest            | Customers prefer <PERSONALITY>offerings by <BRAND>.                |
| Competence      | independent       | <BRAND>promotes <PERSONALITY>way of life.                          |
|                 | contemporary      | Offerings by <BRAND>are <PERSONALITY>.                             |
|                 | reliable          | <BRAND>products are recognized as <PERSONALITY>products.           |
|                 | persistent        | <BRAND>is <PERSONALITY>.                                           |
|                 | secure            | <BRAND>products or offerings are known for being <PERSONALITY>.    |
|                 | intelligent       | <BRAND>has some <PERSONALITY>promotion strategies.                 |
|                 | technical         | <BRAND>is highly <PERSONALITY>.                                    |
|                 | corporate         | <BRAND>comes across as <PERSONALITY>.                              |
|                 | successful        | <BRAND>is considered as a <PERSONALITY>brand.                      |
|                 | leader            | <BRAND>is considered as a <PERSONALITY>in it category.             |
| Sophistication  | confident         | <BRAND>has a <PERSONALITY>public face.                             |
|                 | elite             | <BRAND>is recognized as <PERSONALITY>.                             |
|                 | glamorous         | <BRAND>products are <PERSONALITY>.                                 |
|                 | appealing         | Offerings by <BRAND>are normally <PERSONALITY>.                    |
|                 | charming          | Often times <BRAND>is <PERSONALITY>.                               |
|                 | feminine          | <BRAND>has <PERSONALITY>persona.                                   |
| Ruggedness      | smooth            | The products of the <BRAND>are <PERSONALITY>in nature.             |
|                 | outdoorsy         | <BRAND>is regarded as <PERSONALITY>.                               |
|                 | masculine         | <BRAND>has <PERSONALITY>outlook.                                   |
|                 | western           | The products of the <BRAND>are generally considered <PERSONALITY>. |
|                 | tough             | Offerings by <BRAND>are considered <PERSONALITY>.                  |
|                 | rugged            | Offerings for <BRAND>are for <PERSONALITY>.                        |

Table 16: Synthetic dataset.
